# Supplementary material
Source: PubMed Central journal article supplement (PMC6391678)
Supplement: ba025114-suppl1.pdf [file ba025114-suppl1.pdf]

# Progression of Mycosis Fungoides occurs through divergence of tumor immunophenotype by differential expression of HLA-DR

Murray DJ, McMurray J, Eldershaw SA,  
Pearce H, Davies N, Scarisbrick J & Moss P

## 1 Supplemental Methods

LMD files were obtained from the Gallios flow-cytometer and processed in Kaluza (v1.5). Compensation was calculated from single-stained beads and was applied to all flow cytometry data. Beads were run on each day of experiments to monitor equipment performance. Manual gating was used to identify a viable CD3+ population sequentially gating on singlets, lymphocytes, PI-, CD14-, CD19-, CD56- and CD3+. Example gating can be seen in Figure S2. Further cell populations were identified using Boolean gating as in Table S7. For each population, the geometric mean was measured for surface markers and gate percentage for transcription factors and cytokine production. Compensated fluorescence measurements were arcsinh transformed using R. Principal component analysis and heatmap, missing surface expression data (3.4%) was imputed using package 'rfImpute', and the arcsinh fold-change to peripheral blood was calculated for TIL CD4, TIL CD8, Tumor populations. Package 'RtSNE' was used for dimension reduction and visualisation of exported compensated single cell data. Cytometry data was merged with clinical data in order to analyse outcomes.

## 2 Supplemental Tables

| Population | Boolean gating                              |
|------------|---------------------------------------------|
| PB CD4     | vCD3+ AND CD4+ AND NOT clone AND blood      |
| PB CD8     | vCD3+ AND CD8+ AND blood                    |
| TIL CD4    | vCD3+ AND CD4+ AND NOT clone AND skin       |
| TIL CD8    | vCD3+ AND CD8+ AND skin                     |
| Tumor      | vCD3+ AND NOT(CD8+ CD4-) AND clone AND skin |

Table S1: Boolean gating strategy for cell populations. All clonotypic samples were either CD4+ or CD4 downregulated, so the clone was not excluded for CD8 populations. Tumor could taken on an aberrant CD4 and CD8 phenotype, including downregulation of CD4 and some expression of CD8.

| Fluorophore      | Specificity   | Clone    | Source          |
|------------------|---------------|----------|-----------------|
| FITC             | TCR-V $\beta$ |          | Beckman Coulter |
| PE               | TCR-V $\beta$ |          | Beckman Coulter |
| PE-dazzle594     | CD14          | HCD14    | Biolegend       |
| PE-dazzle594     | CD19          | HIB19    | Biolegend       |
| PE-dazzle594     | CD56          | 5.1H11   | Biolegend       |
| Propidium Iodide |               |          |                 |
| PerCP-EF710      | TIGIT         | MBSA43   | eBioscience     |
| PE-Cy7           | PD-1          | EH12.2H7 | Biolegend       |
| APC              | PD-L2         | MIH18    | Biolegend       |
| AF700            | CD4           | OKT4     | Biolegend       |
| APC-Cy7          | CD3           | SK7      | Biolegend       |
| BV421            | PD-L1         | 29E,2A3  | Biolegend       |
| BV510            | CD8           | RPA-T8   | Biolegend       |

Table S2: Panel 1

| Fluorophore      | Specificity   | Clone   | Source          |
|------------------|---------------|---------|-----------------|
| FITC             | TCR-V $\beta$ |         | Beckman Coulter |
| PE               | TCR-V $\beta$ |         | Beckman Coulter |
| PE-dazzle594     | CD14          | HCD14   | Biolegend       |
| PE-dazzle594     | CD19          | HIB19   | Biolegend       |
| PE-dazzle594     | CD56          | 5.1H11  | Biolegend       |
| Propidium Iodide |               |         |                 |
| PerCP-Cy5.5      | Galectin 9    | PM1-3   | Biolegend       |
| PE-Cy7           | HLA-DR        | LN3     | Biolegend       |
| AF647            | LAG3          | 11C3C65 | Biolegend       |
| AF700            | CD4           | OKT4    | Biolegend       |
| APC-Cy7          | CD3           | SK7     | Biolegend       |
| BV421            | Tim3          | F38-2E2 | Biolegend       |
| BV510            | CD8           | RPA-T8  | Biolegend       |

Table S3: Panel 2

| Fluorophore  | Specificity   | Clone    | Source          |
|--------------|---------------|----------|-----------------|
| FITC         | TCR-V $\beta$ |          | Beckman Coulter |
| PE           | TCR-V $\beta$ |          | Beckman Coulter |
| PE-dazzle594 | CD14          | HCD14    | Biolegend       |
| PE-dazzle594 | CD19          | HIB19    | Biolegend       |
| PE-dazzle594 | CD56          | 5.1H11   | Biolegend       |
| Zombie Red   | FVD           |          | Biolegend       |
| PerCP-Cy5.5  | IL10          | JES3-9D7 | Biolegend       |
| PE-Cy7       | CD25          | M-A251   | BD Biosciences  |
| AF647        | FoxP3         | 259D     | Biolegend       |
| AF700        | CD4           | OKT4     | Biolegend       |
| APC-Cy7      | CD3           | SK7      | Biolegend       |
| BV421        | TGF-B1        | TW4-2F8  | Biolegend       |
| BV510        | CD8           | RPA-T8   | Biolegend       |

Table S4: Panel 3

| Fluorophore      | Specificity   | Clone  | Source          |
|------------------|---------------|--------|-----------------|
| FITC             | TCR-V $\beta$ |        | Beckman Coulter |
| PE               | TCR-V $\beta$ |        | Beckman Coulter |
| PE-dazzle594     | CD14          | HCD14  | Biolegend       |
| PE-dazzle594     | CD19          | HIB19  | Biolegend       |
| PE-dazzle594     | CD56          | 5.1H11 | Biolegend       |
| Propidium Iodide |               |        |                 |
| PE-Cy7           | MHC I         | W6/32  | Biolegend       |
| APC              | FasL          | NOK1   | BD Biosciences  |
| AF700            | CD4           | OKT4   | Biolegend       |
| APC-Cy7          | CD3           | SK7    | Biolegend       |
| BV421            | Fas           | DX2    | Biolegend       |
| BV510            | CD8           | RPA-T8 | Biolegend       |

Table S5: Panel 4

| Fluorophore  | Specificity   | Clone     | Source          |
|--------------|---------------|-----------|-----------------|
| FITC         | TCR-V $\beta$ |           | Beckman Coulter |
| PE           | TCR-V $\beta$ |           | Beckman Coulter |
| PE-dazzle594 | CD14          | HCD14     | Biolegend       |
| PE-dazzle594 | CD19          | HIB19     | Biolegend       |
| PE-dazzle594 | CD56          | 5.1H11    | Biolegend       |
| Zombie Red   | FVD           |           | Biolegend       |
| PerCP-Cy5.5  | IFN-gamma     | B27       | Biolegend       |
| PE-Cy7       | IL-4          | MP4-25D2  | Biolegend       |
| APC          | IL-10         | JES3-19F1 | Biolegend       |
| AF700        | CD4           | OKT4      | Biolegend       |
| APC-Cy7      | CD3           | SK7       | Biolegend       |
| BV421        | IL-17A        | BL168     | Biolegend       |
| BV510        | CD8           | RPA-T8    | Biolegend       |

Table S6: Panel 5

| Fluorophore  | Specificity | Clone     | Source         |
|--------------|-------------|-----------|----------------|
| FITC         | Granzyme B  | QA16A02   | Biolegend      |
| PE           | CD107a      | H4A3      | Biolegend      |
| PE-dazzle594 | CD14        | HCD14     | Biolegend      |
| PE-dazzle594 | CD19        | HIB19     | Biolegend      |
| PE-dazzle594 | CD56        | 5.1H11    | Biolegend      |
| Zombie Red   | FVD         |           | Biolegend      |
| PerCP-Cy5.5  | CD7         | CD7-6B7   | Biolegend      |
| PE-Cy7       | CD25        | M-A251    | BD Biosciences |
| APC          | CD127       | A019D5    | Biolegend      |
| AF700        | CD4         | OKT4      | Biolegend      |
| APC-Cy7      | CD3         | SK7       | Biolegend      |
| BV421        | IL-2        | MQ1-17H12 | Biolegend      |
| BV510        | CD8         | RPA-T8    | Biolegend      |

Table S7: Panel 6

### 3 Supplemental Figures

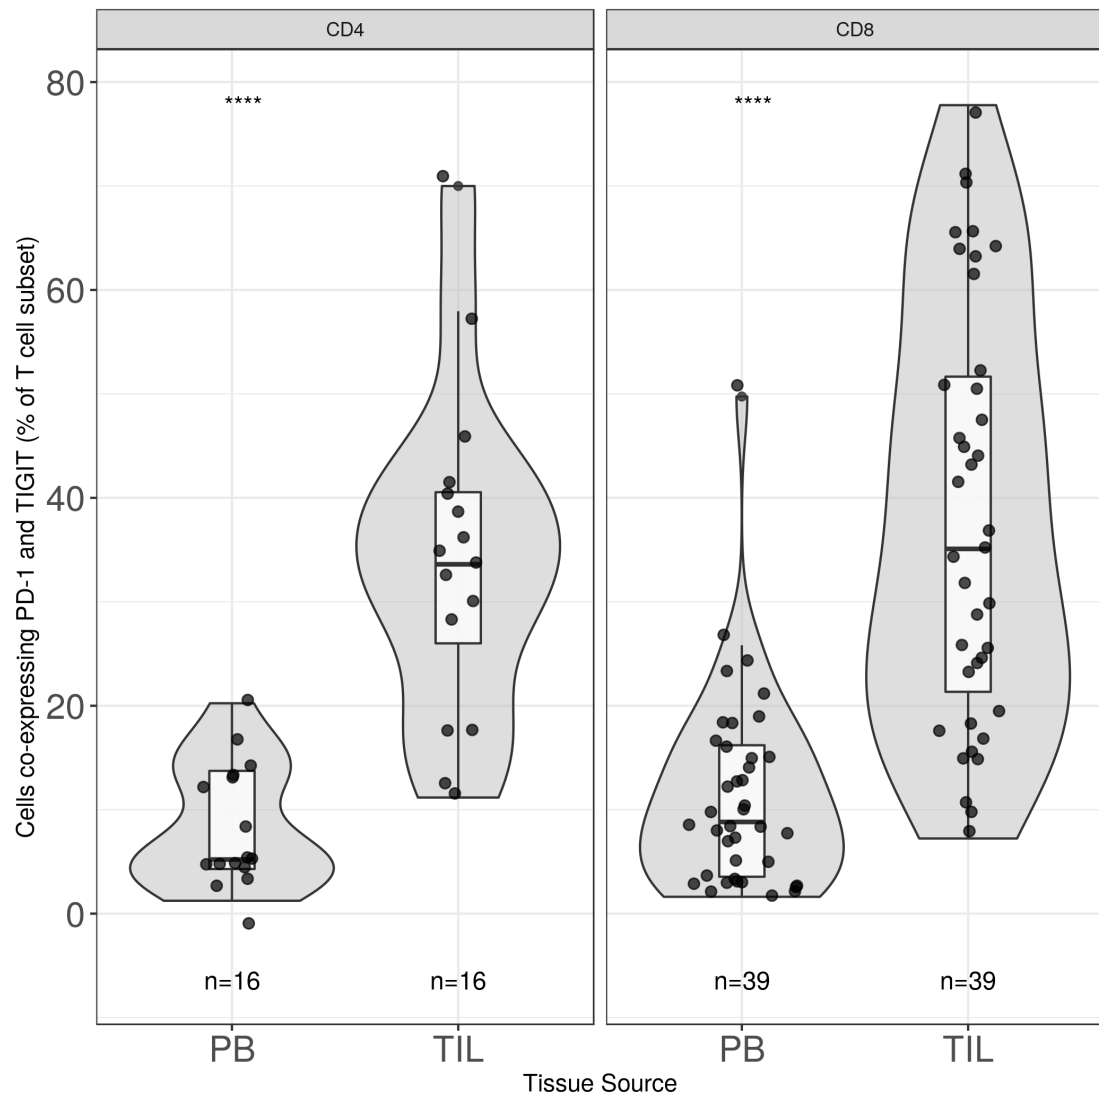

Figure S1: The pattern of of co-expression of of PD-1 and TIGIT on CD4+ and CD8+ T cells within blood and on TIL within tumor biopsies. n = 16 for CD4+ (restricted to cases with clonotypic CD4+ tumor population) and n = 39 for CD8+ analyses

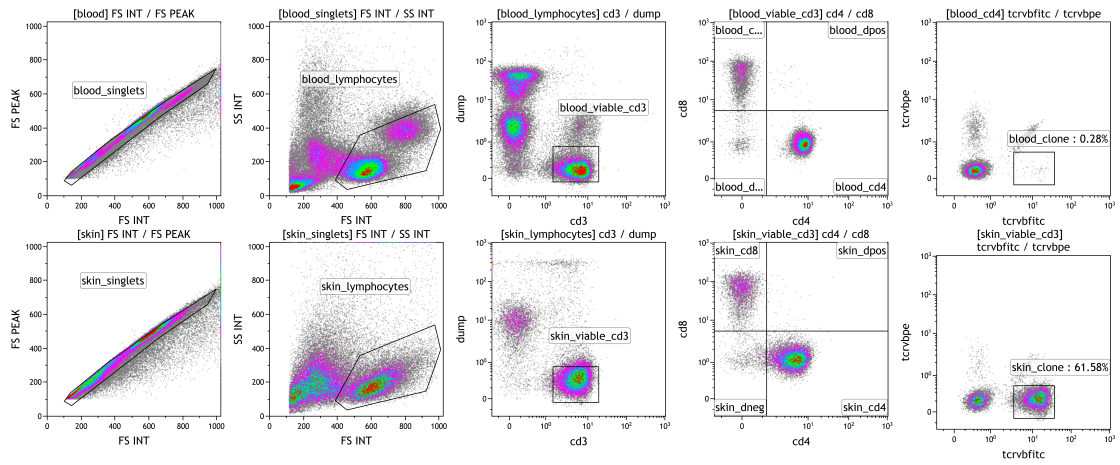

Figure S2: Example of sequential gating strategy

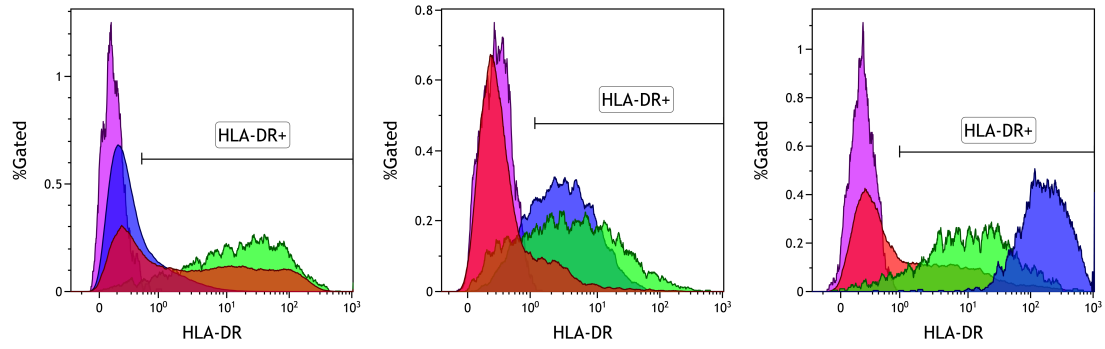

Figure S3: Example of gating from three representative samples of low, medium and high HLA-DR expression. Blue - tumor, green - CD4 TIL, red - CD4 PB, purple - unstained tissue.

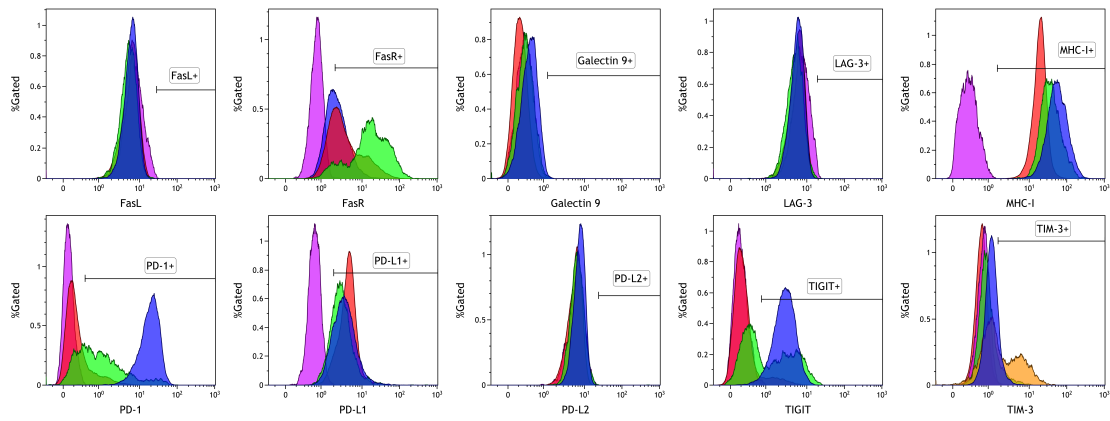

Figure S4: Example gating of other surface markers from single representative patient. Blue - tumor, green - CD4 TIL, orange - CD8 TIL, red - CD4 PB, purple - unstained tissue.

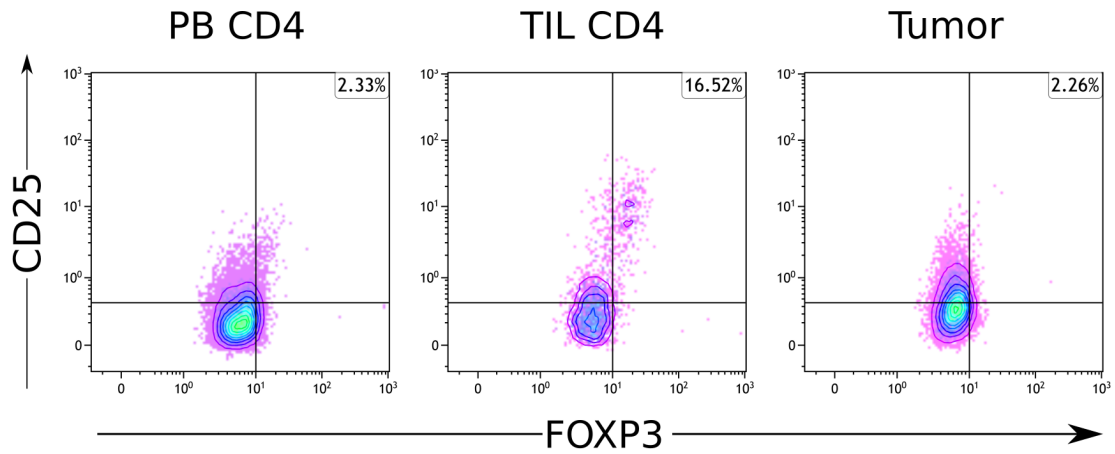

Figure S5: Example of T-regulatory cell gating for peripheral blood, TIL and Tumor

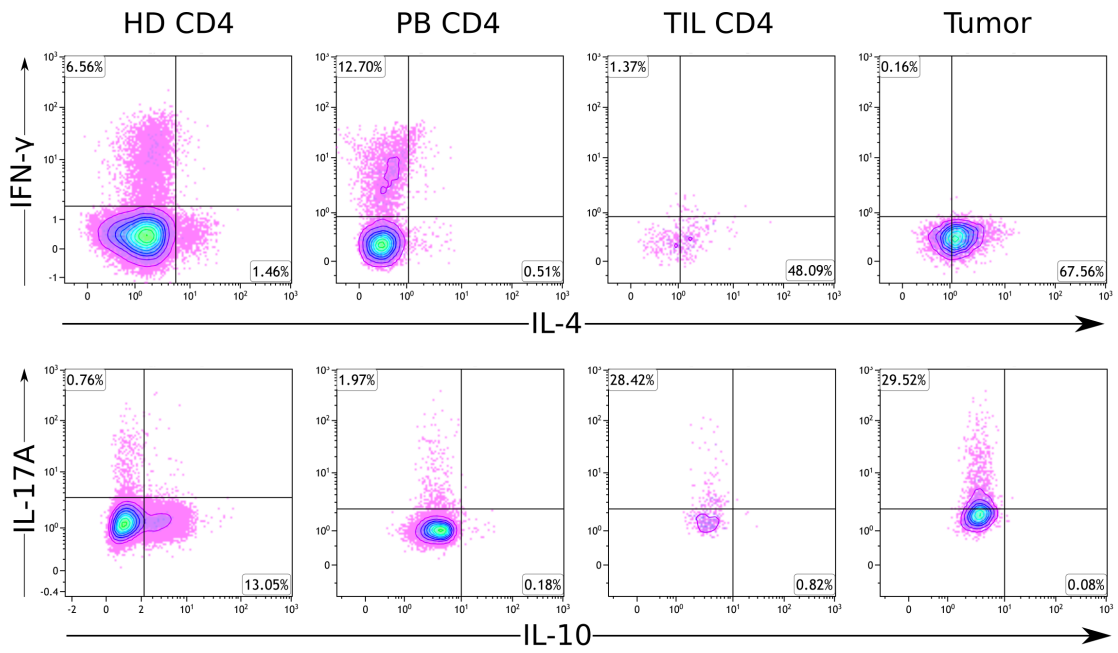

Figure S6: Example of IFN- $\gamma$ , IL4, IL10 and IL17A gating in healthy donor, patient peripheral blood, TIL and Tumor populations.
